# Supplementary material for: Development of a DNA damage-induced senescence model in osteoarthritic chondrocytes
Source: publisher site journal article supplement (doi:10.18632/aging.204881), 2023-09-01
Supplement: Supplementary file [file aging-v15i17-204881-supplementary-material-SD1.pdf]

**SUPPLEMENTARY FIGURES**

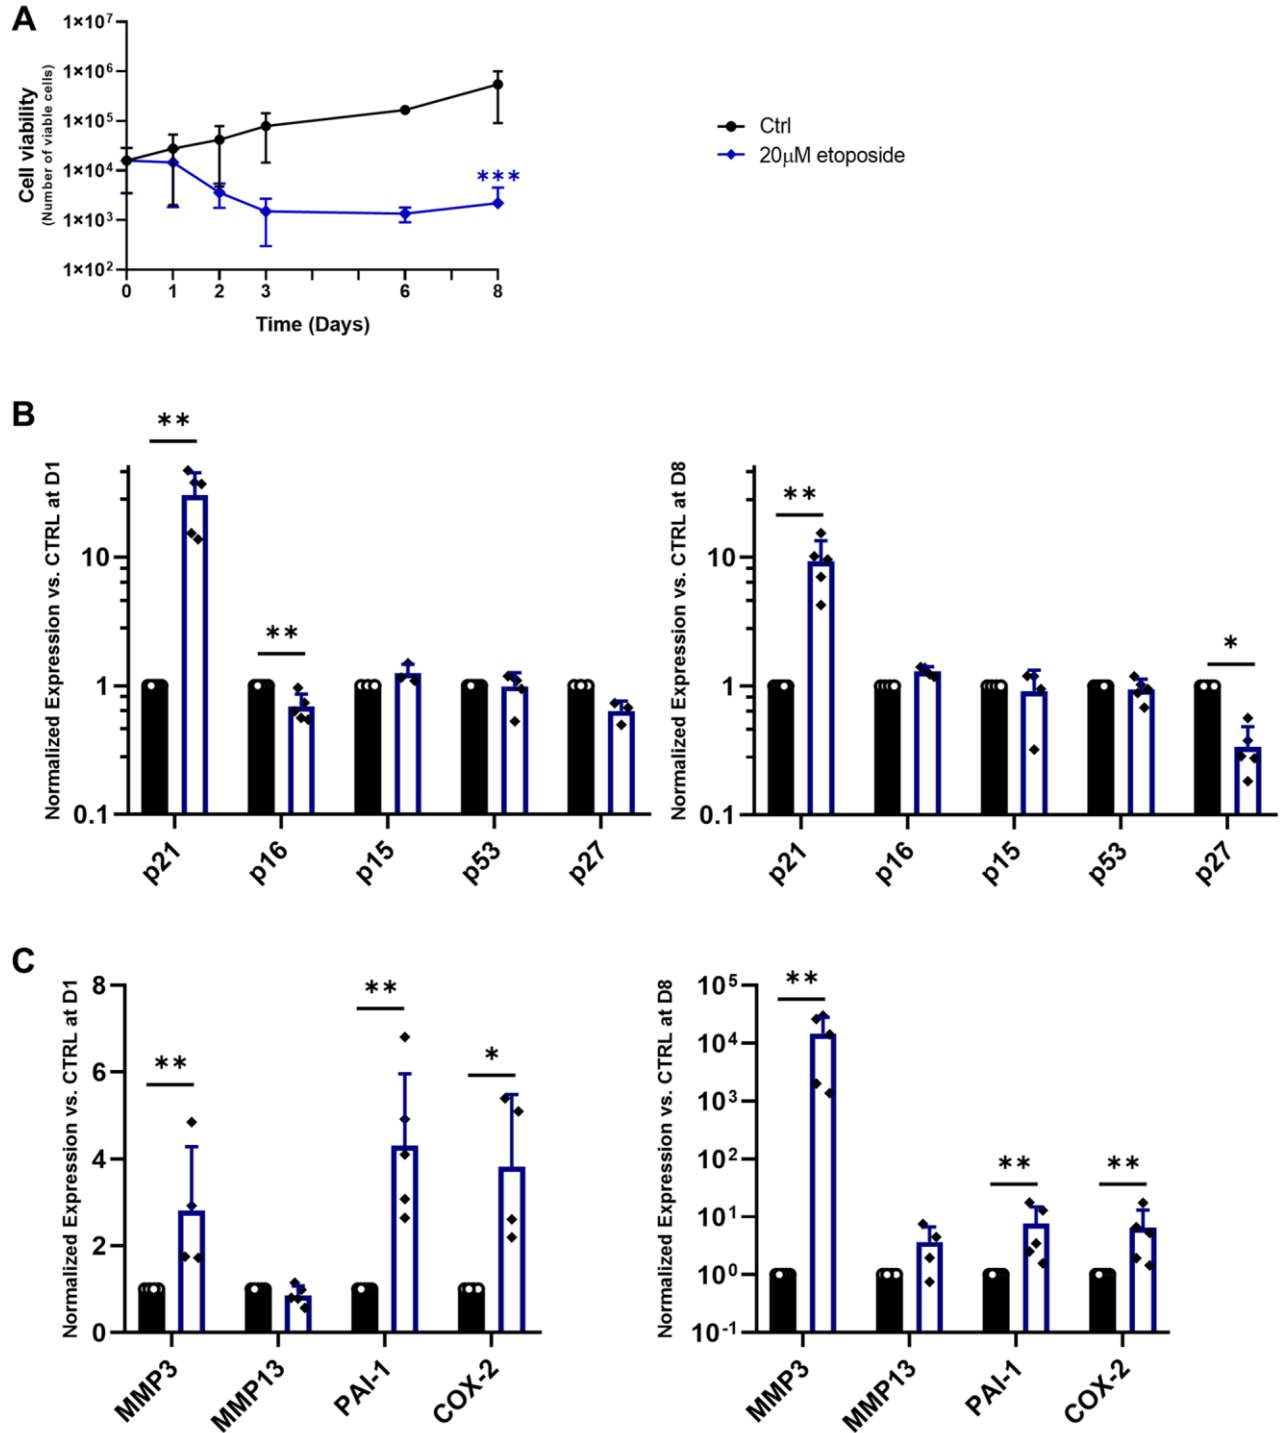

**Supplementary Figure 1. Impact of Etoposide on the TC28a2 chondrocyte cell line.** TC28a2 were treated with etoposide (blue) at 20 µM for 24 h and then cultured in normal media for the length of the experiment. (A) The number of viable cells was assessed by trypan blue exclusion dye. Data are shown as mean ± SD, (n = 3). P-values were calculated by the two-way ANOVA test. \*\*\*p < 0,001. (B, C) The expressions of cyclin-dependent kinase inhibitors (B) and SASP markers (C) were evaluated by RT-qPCR at the indicated times. Data are shown as mean ± SD, (n ≥ 3). P-values were calculated by Mann-Whitney test, \*p ≤ 0.05; \*\*p < 0.01; \*\*\*p < 0.001.

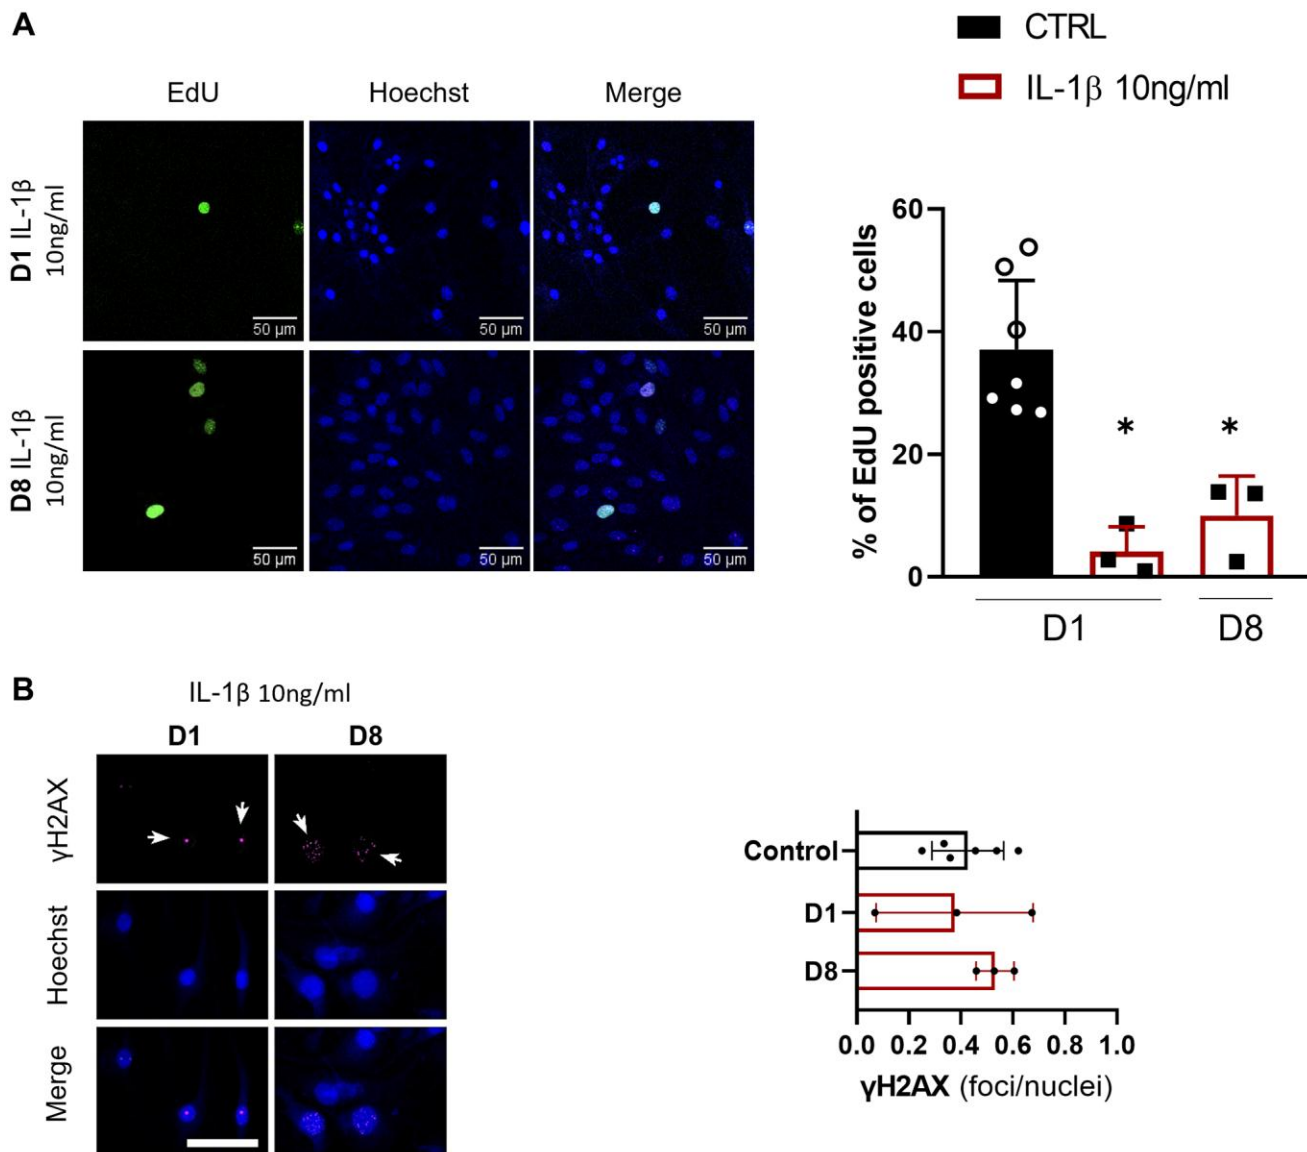

**Supplementary Figure 2. Impact of high-dose IL-1 $\beta$ -treatment on HACs proliferation and DNA damage.** HACs were treated with IL-1 $\beta$  at 10 ng/mL for the length of the experiment, the results are compared with the 1 ng/mL IL1 $\beta$  treatment presented in Figures 2 and 4. (A) EdU was used to identify proliferative cells and Hoechst staining to visualize the nucleus at day 1 and 8. The images were analyzed by quantification of positive cells for EdU normalized versus the total number of cells obtained with the Hoechst staining at each time. (B)  $\gamma$ H2AX immunofluorescence was used to identify DNA damage-associated foci and Hoechst staining to visualize the nucleus at day 1 and day 8. Quantification of the average number of foci per nuclei is shown. Scale bars = 50  $\mu$ m. Data are shown as mean  $\pm$  SD, ( $n = 3$ ).  $P$ -values were calculated by Kruskal-Wallis test, \* $p \leq 0.05$ ; \*\*\* $p < 0.001$ .
